# Supplementary material
Source: publisher site journal article supplement (https://www.spandidos-publications.com/3491/downloadSupplementary)

Figure S1. Screening of specific siRNA and detection of transfection efficiency. (A) Western blotting and (B) reverse transcription-quantitative PCR assays were used to detect the specific siRNA for FoxO1, and (A) the quantification of proteins was performed by GraphPad Prism. \*\* $P < 0.01$ , \*\*\* $P < 0.001$ , \*\*\*\* $P < 0.0001$  vs. control; ## $P < 0.01$ , ### $P < 0.001$ , #### $P < 0.0001$  vs. si-NC. siRNA/si-, small interfering RNA; NC, negative control.

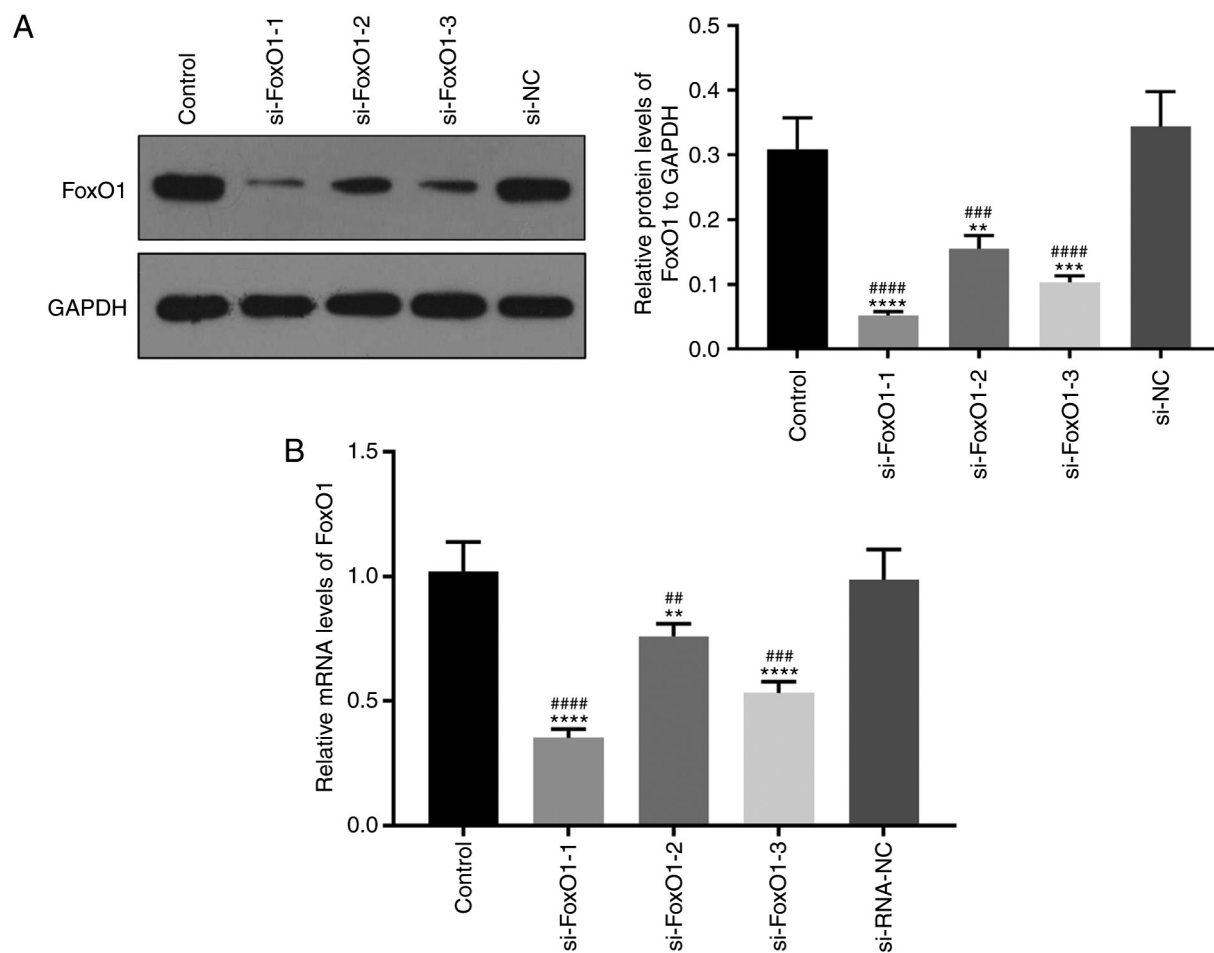

Figure S2. miR-124-5p-mimics/inhibitors were successfully transfected into the cells. Reverse transcription-quantitative assay was used to detect the transfection efficiency of (A) miR-124-5p-mimics and (B) miR-124-5p-inhibitors. \*\*P<0.01, \*\*\*P<0.0001 vs. control; ##P<0.01, ####P<0.0001 vs. mimic-NC/inhibitor-NC. miR, microRNA; NC, negative control.

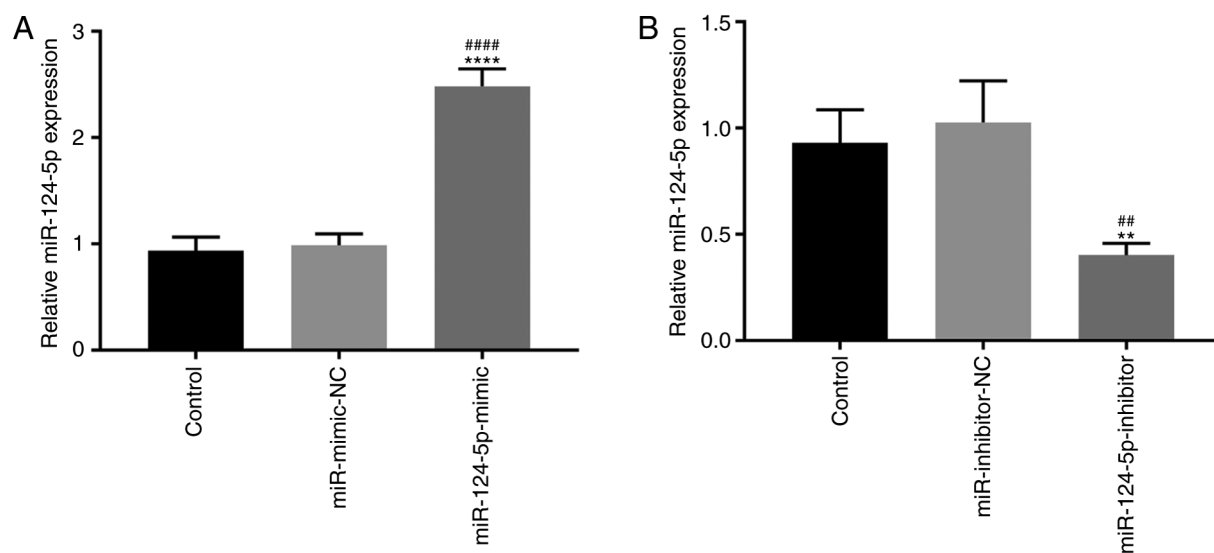

Supplement: Supplementary file 1 [file downloadSupplementary]
